# Supplementary material for: Flubendazole elicits anti-cancer effects via targeting EVA1A-modulated autophagy and apoptosis in Triple-negative Breast Cancer
Source: PubMed Central journal article supplement (PMC7381743; doi:10.7150/thno.43473), 2020-07-02
Supplement: thnov10p8080s1.pdf [file thnov10p8080s1.pdf]

## Supplementary Material

### **Flubendazole elicits anti-cancer effects via targeting EVA1A-modulated autophagy and apoptosis in triple-negative breast cancer**

Yongqi Zhen<sup>a, b</sup>, Rongyan Zhao<sup>a</sup>, Minjuan Wang<sup>a</sup>, Xing Jiang<sup>a</sup>, Feng Gao<sup>a</sup>, Leilei Fu<sup>a\*</sup>,  
Lan Zhang<sup>a\*</sup>, Xian-Li Zhou<sup>a, b\*</sup>

<sup>a</sup>School of Life Science and Engineering, Southwest Jiaotong University, Chengdu,  
P.R. China.

<sup>b</sup>Key Laboratory of Advanced Technologies of Materials, Ministry of Education,  
Southwest Jiaotong University, Chengdu, P.R. China.

\*Correspondence: Dr. Leilei, Fu, E-mail: leilei\_fu@163.com; Dr. Lan, Zhang, E-mail:  
zhanglanx\_9@126.com; Prof. Xian-Li, Zhou, E-mail: zhouxl@swjtu.edu.cn.

Postal address: School of Life Science and Engineering, Southwest Jiaotong  
University, NO.111, North Second Ring Road, Chengdu 610031, Sichuan, P.R. China.

## Supplementary Figure S1

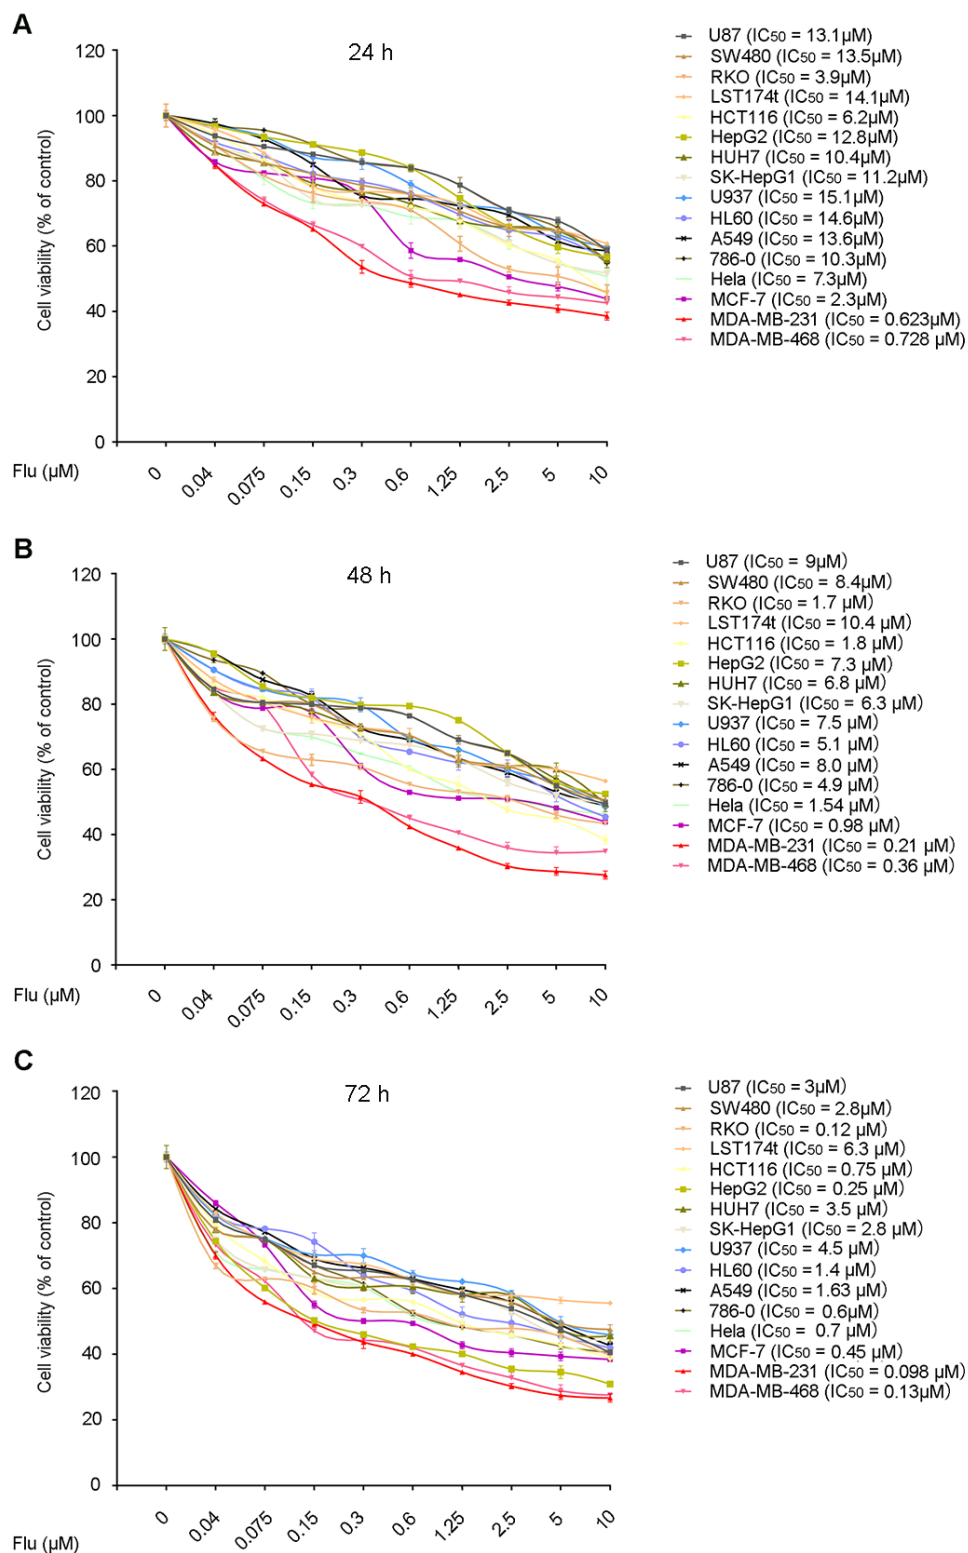

**Figure S1.** Antitumor effect of flubendazole. (A-C) The cell viability of concentration-dependent and time-dependent treated with flubendazole in various tumor lines. Cell viabilities were

measured by MTT assay, and the IC<sub>50</sub> values were calculated by Prism 7.0. Data are expressed as mean ± SEM. All data were representative of at least three independent experiments.

## Supplementary Figure S2

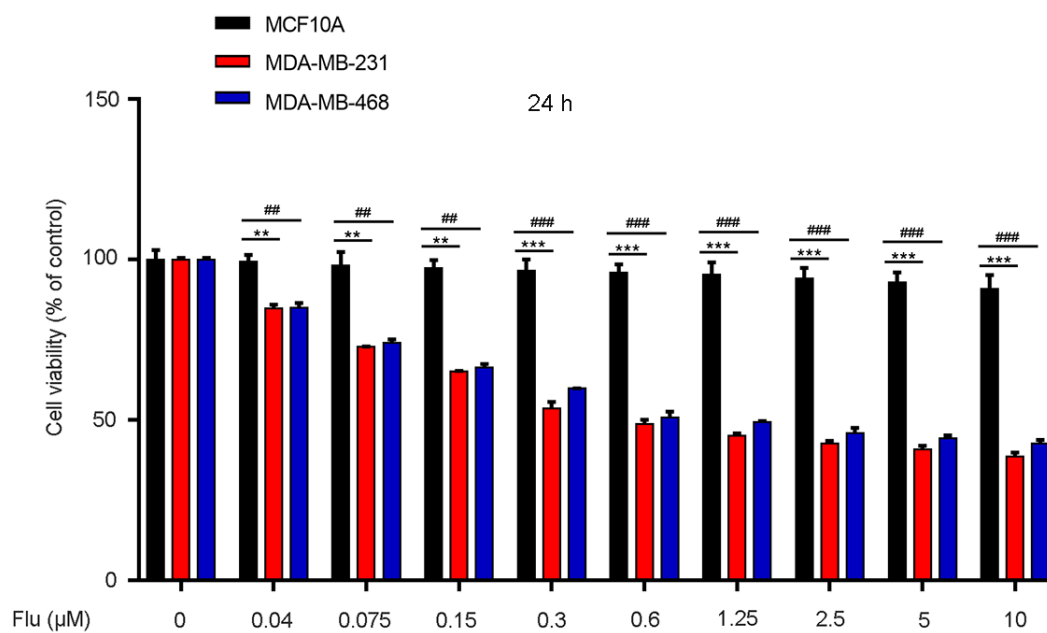

**Figure S2.** Cell viability of flubendazole on normal breast cells and TNBC cells. (A) The cell viability of concentration-dependent treated with flubendazole for 24 h. Cell viabilities were measured by MTT assay. Data are expressed as mean  $\pm$  SEM. All data were representative of at least three independent experiments. \*\*,  $P < 0.01$ , \*\*\*, ###,  $P < 0.001$ . Statistical significance compared with respective control groups.

### Supplementary Figure S3

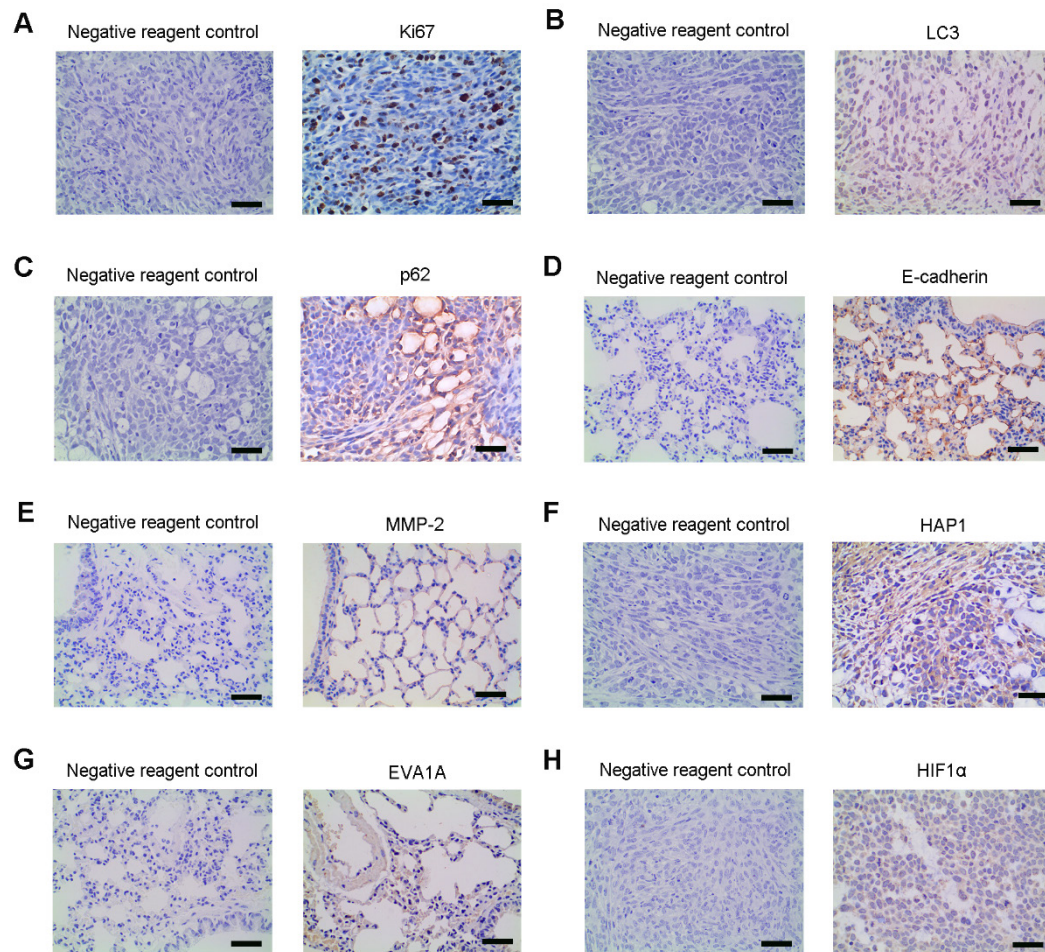

**Figure S3.** Immunohistochemistry from tumor sections or lung tissue in nude mice. (A-H) Representative images of Ki67, LC3, p62, E-cadherin, MMP-2, EVA1A, HAP1 and HIF1 $\alpha$  in nude mice tumor sections or lung tissues and their respective negative controls, which used as the indication of antibody specificity.

## Supplementary Figure S4

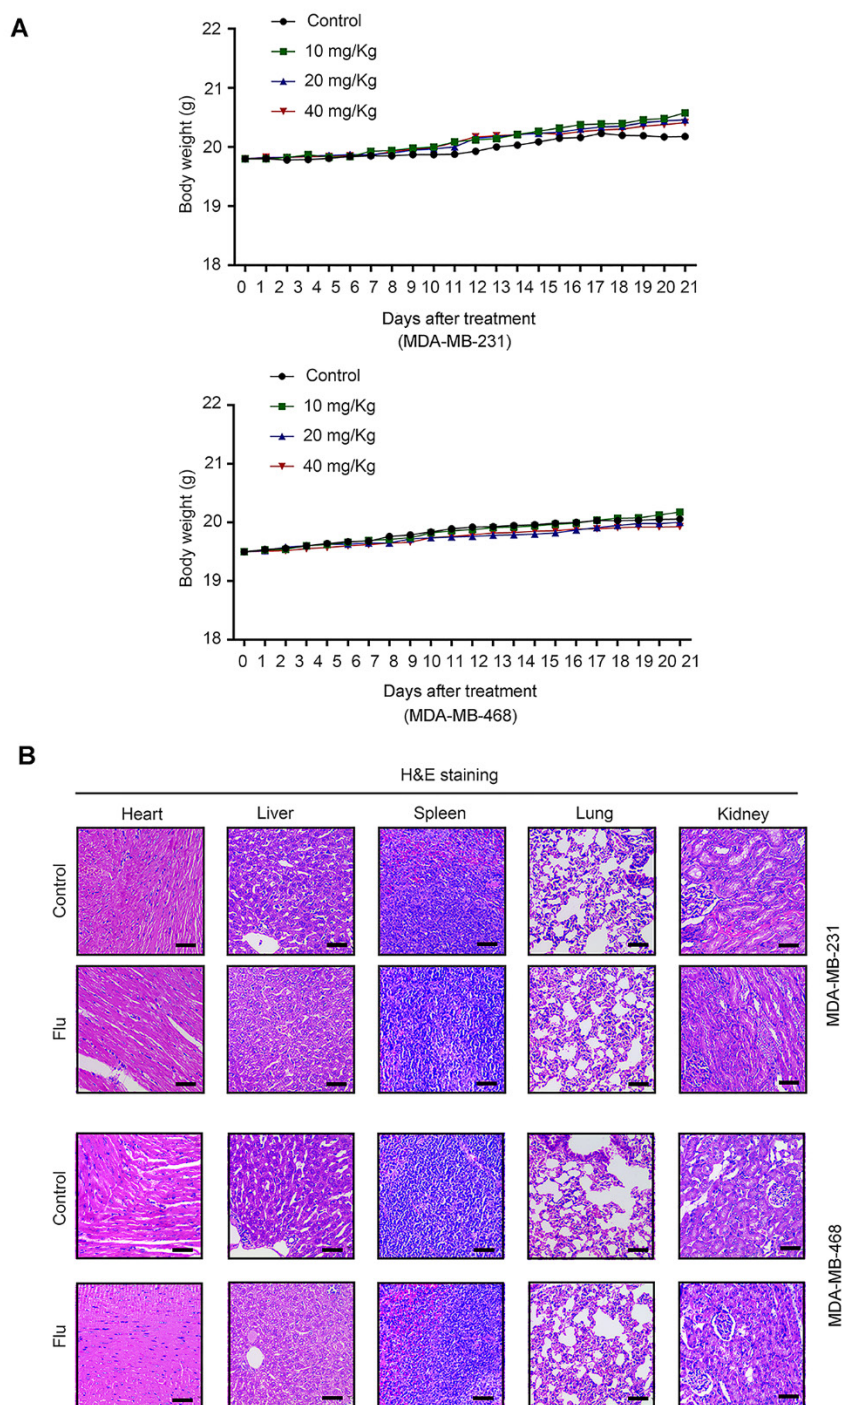

**Figure S4.** Flubendazole inhibits TNBC *in vivo*. (A) Body weight change of mice in different group, compared with control group. (B) Representative H&E staining in heart, liver, spleen, lung, kidney sections. Scale bar, 40  $\mu$ m. Data are expressed as mean  $\pm$  SEM. All data were representative of at least three independent experiments.



## Supplementary Figure S5

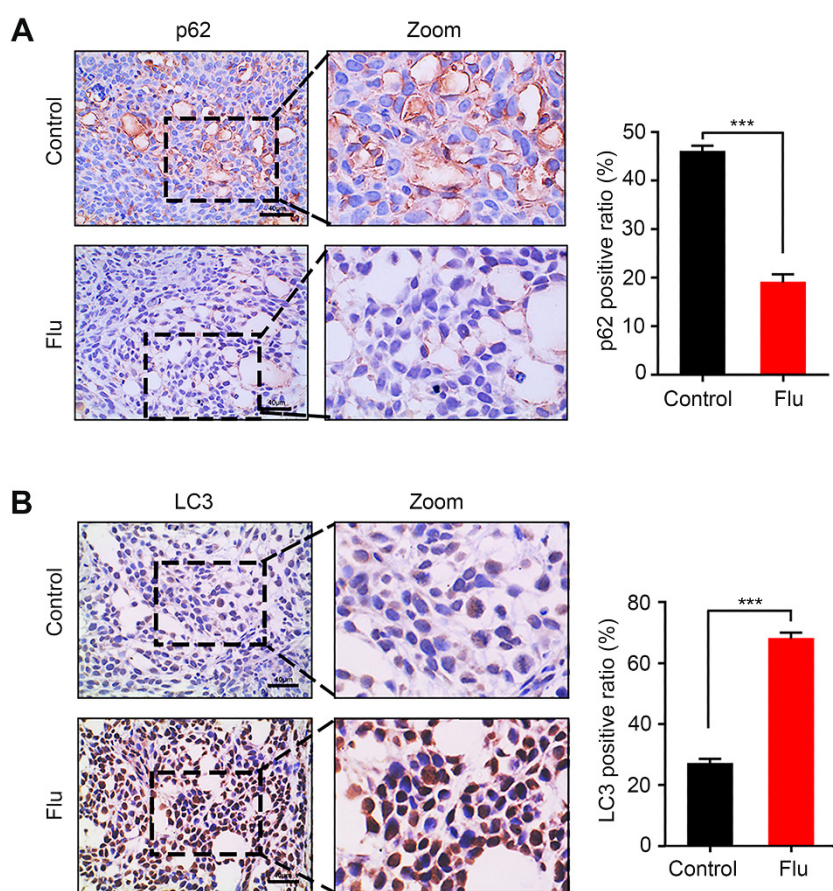

**Figure S5.** Flubendazole induces autophagy *in vivo*. (A-B) The expression of p62 and LC3 in representative tumor sections of nude mice from control and median dose (20 mg/Kg). Representative images and quantitative analysis of the percentage of positive ratios were shown. Scale bar, 40  $\mu$ m. Data are expressed as mean  $\pm$  SEM. All data were representative of at least three independent experiments. \*,  $P < 0.05$ , \*\*,  $P < 0.01$ , \*\*\*,  $P < 0.001$ . Statistical significance compared with respective control groups.

## Supplementary Figure S6

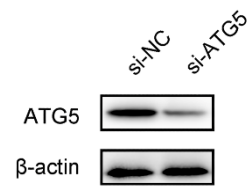

**Figure S6.** MDA-MB-231 cells were transfected with control or ATG5 siRNA. Then, the expression levels of ATG5 was determined by western blot analysis.  $\beta$ -Actin was measured as the loading control.



## Supplementary Figure S7

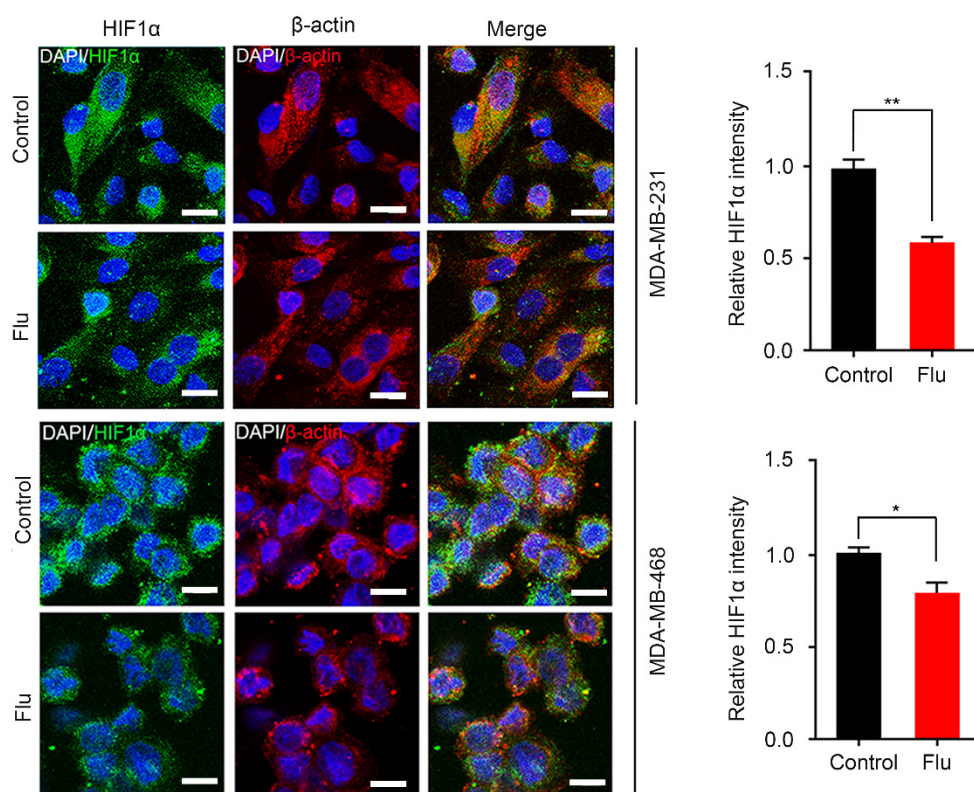

**Figure S7.** Flubendazole downregulates the expression of HIF1 $\alpha$  *in vitro*. Immunofluorescence analysis of HIF1 $\alpha$  in MDA-MB-231 and MDA-MB-468 cells treated with or without flubendazole (0.5  $\mu$ M) for 24 h. Scale bar, 20  $\mu$ m. Data are expressed as mean  $\pm$  SEM. All data were representative of at least three independent experiments. \*,  $P < 0.05$ , \*\*,  $P < 0.01$ , \*\*\*,  $P < 0.001$ . Statistical significance compared with respective control groups.

## Supplementary Figure S8

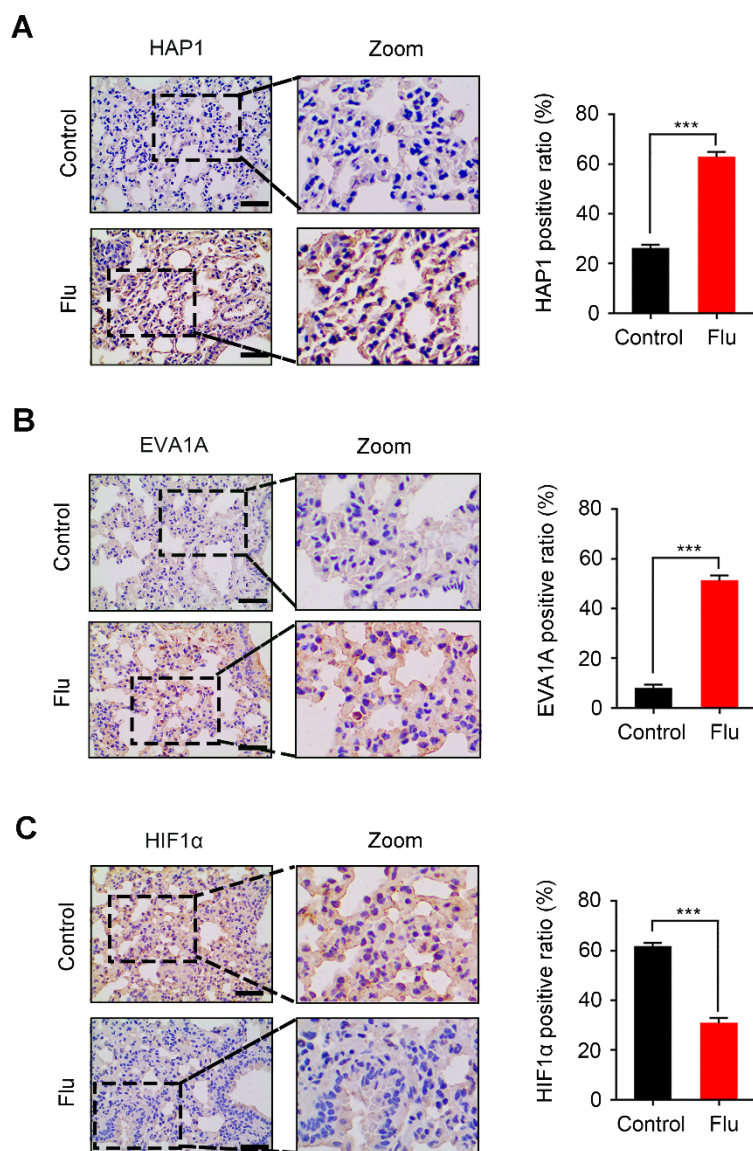

**Figure S8.** Flubendazole regulates the expression of HAP1, EVA1A and HIF1 $\alpha$  *in vivo*. (A-C)

The expression of HAP1, EVA1A and HIF1 $\alpha$  in representative lung sections of nude mice from vehicle and median dose (20 mg/Kg). Representative images and quantitative analysis of the percentage of positive ratios were shown. Scale bar, 40  $\mu$ m. Data are expressed as mean  $\pm$  SEM.

All data were representative of at least three independent experiments. \*,  $P < 0.05$ , \*\*,  $P < 0.01$ ,

\*\*\*,  $P < 0.001$ . Statistical significance compared with respective control groups.

## Supplementary Figure S9

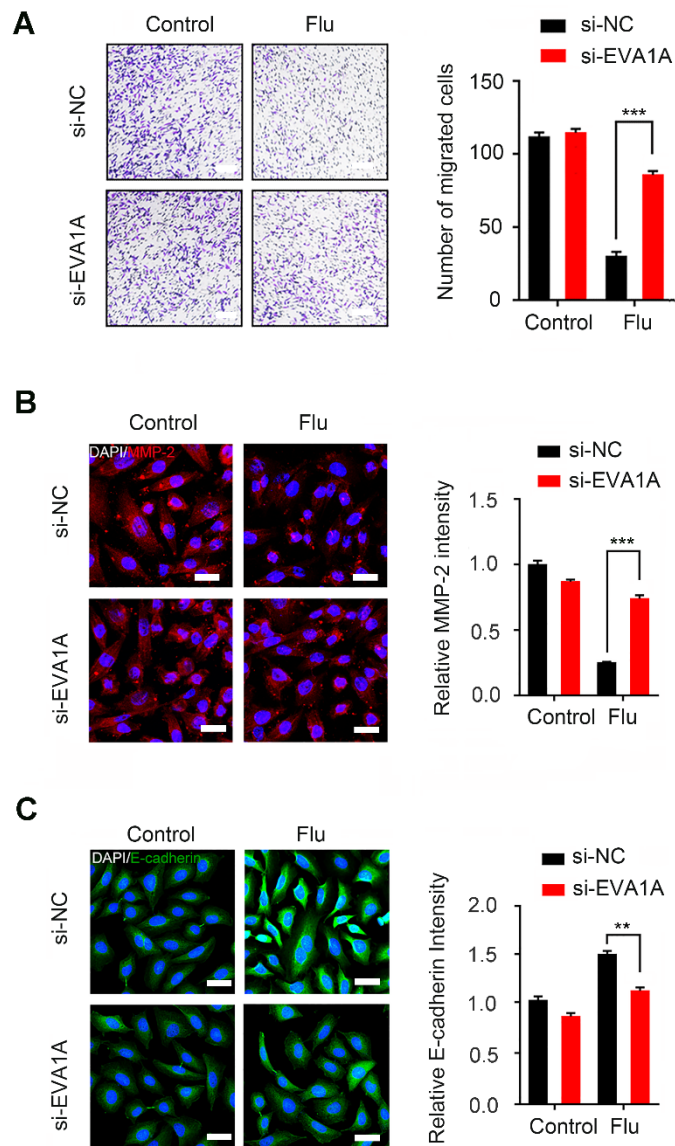

**Figure S9.** Flubendazole elicits anti-migration potential via targeting EVA1A *in vitro*. (A) The MDA-MB-231 cells were transfected with control or EVA1A siRNA, followed by treatment with or without flubendazole (0.5  $\mu$ M) for 24 h. Transwell assay was used to measure migration capabilities of cells. Representative images and statistics were shown. Scale bar, 100  $\mu$ m. (B-C) The MDA-MB-231 cells were transfected with control or EVA1A siRNA, followed by treatment with or without flubendazole (0.5  $\mu$ M) for 24 h. The expression of MMP-2 and E-cadherin were

analyzed by immunofluorescence. Scale bar, 20  $\mu\text{m}$ . Data are expressed as mean  $\pm$  SEM. All data were representative of at least three independent experiments. \*,  $P < 0.05$ , \*\*,  $P < 0.01$ , \*\*\*,  $P < 0.001$ . Statistical significance compared with respective control groups.

**Supplementary Table 2. List of siRNA or cDNA sequences**

| Gene name  | siRNA sense sequences (5'-3') |
|------------|-------------------------------|
| si-EVA1A   | GAGCCTGAATCGCTACTATTA         |
| si-Control | TTCTCCGAACGTGTACGT            |

  

| Recombinant DNA                                  | DNA sense sequences                                                                                                                                                                                                                                                                                                                                                                                                                                                                                                                                                                      |
|--------------------------------------------------|------------------------------------------------------------------------------------------------------------------------------------------------------------------------------------------------------------------------------------------------------------------------------------------------------------------------------------------------------------------------------------------------------------------------------------------------------------------------------------------------------------------------------------------------------------------------------------------|
| C-terminal Flag-tagged<br>EVA1A <sup>WT</sup>    | ATGAGGCTGCCCCTCAGCCACAGCCCAGAGCACGTGGAGATGGCTTTG<br>CTCAGCAACATCCTAGCGGCCTATTCCCTTTGTCTCAGAAAATCCTGAGC<br>GAGCAGCTCTGTACTTTGTTTCTGGCGTGTGCATCGGGCTGGTGCTGAC<br>CCTGGCTGCTCTGGTGATAAGGATCTCTTGCCACACAGACTGCAGGCGG<br>CGTCCCGGGAAGAAGTTCCTGCAGGACAGAGAGAGCAGCAGCGACAG<br>CAGCGACAGCGAGGATGGCAGTGAGGACACCGTGTCCGATCTCTCCGT<br>GCGGAGACACCGCCGCTTCGAGAGGACTTTGAACAAGAATGTGTTTAC<br>CTCTGCGGAGGAGCTGGAGCGCGCCAGCGGCTGGAGGAGCGCGAGC<br>GCATCATCAGGGAGATCTGGATGAATGGCCAGCCTGAGGTGCCCGGGA<br>CCAGGAGCCTGAATCGCTACTATTAGGACTACAAGGATGACGATGACAA<br>GGATTACAAAGACGACGATAAGGACTATAAGGATGATGACGACAAA |
| C-terminal Flag-tagged<br>EVA1A <sup>N110A</sup> | ATGAGGCTGCCCCTCAGCCACAGCCCAGAGCACGTGGAGATGGCTTTG<br>CTCAGCAACATCCTAGCGGCCTATTCCCTTTGTCTCAGAAAATCCTGAGC<br>GAGCAGCTCTGTACTTTGTTTCTGGCGTGTGCATCGGGCTGGTGCTGAC<br>CCTGGCTGCTCTGGTGATAAGGATCTCTTGCCACACAGACTGCAGGCGG<br>CGTCCCGGGAAGAAGTTCCTGCAGGACAGAGAGAGCAGCAGCGACAG<br>CAGCGACAGCGAGGATGGCAGTGAGGACACCGTGTCCGATCTCTCCGT<br>GCGGAGACACCGCCGCTTCGAGAGGACTTTGAACAAGGCTGTGTTTAC<br>CTCTGCGGAGGAGCTGGAGCGCGCCAGCGGCTGGAGGAGCGCGAGC<br>GCATCATCAGGGAGATCTGGATGAATGGCCAGCCTGAGGTGCCCGGGA<br>CCAGGAGCCTGAATCGCTACTATTAGGACTACAAGGATGACGATGACAA<br>GGATTACAAAGACGACGATAAGGACTATAAGGATGATGACGACAAA |
| C-terminal Flag-tagged<br>EVA1A <sup>W135A</sup> | ATGAGGCTGCCCCTCAGCCACAGCCCAGAGCACGTGGAGATGGCTTTG<br>CTCAGCAACATCCTAGCGGCCTATTCCCTTTGTCTCAGAAAATCCTGAGC<br>GAGCAGCTCTGTACTTTGTTTCTGGCGTGTGCATCGGGCTGGTGCTGAC<br>CCTGGCTGCTCTGGTGATAAGGATCTCTTGCCACACAGACTGCAGGCGG<br>CGTCCCGGGAAGAAGTTCCTGCAGGACAGAGAGAGCAGCAGCGACAG<br>CAGCGACAGCGAGGATGGCAGTGAGGACACCGTGTCCGATCTCTCCGT<br>GCGGAGACACCGCCGCTTCGAGAGGACTTTGAACAAGAATGTGTTTAC<br>CTCTGCGGAGGAGCTGGAGCGCGCCAGCGGCTGGAGGAGCGCGAGC<br>GCATCATCAGGGAGATCGCGATGAATGGCCAGCCTGAGGTGCCCGGGA<br>CCAGGAGCCTGAATCGCTACTATTAGGACTACAAGGATGACGATGACAA<br>GGATTACAAAGACGACGATAAGGACTATAAGGATGATGACGACAAA |
| C-terminal Flag-tagged<br>EVA1A <sup>T113A</sup> | ATGAGGCTGCCCCTCAGCCACAGCCCAGAGCACGTGGAGATGGCTTTG<br>CTCAGCAACATCCTAGCGGCCTATTCCCTTTGTCTCAGAAAATCCTGAGC<br>GAGCAGCTCTGTACTTTGTTTCTGGCGTGTGCATCGGGCTGGTGCTGAC<br>CCTGGCTGCTCTGGTGATAAGGATCTCTTGCCACACAGACTGCAGGCGG<br>CGTCCCGGGAAGAAGTTCCTGCAGGACAGAGAGAGCAGCAGCGACAG<br>CAGCGACAGCGAGGATGGCAGTGAGGACACCGTGTCCGATCTCTCCGT<br>GCGGAGACACCGCCGCTTCGAGAGGACTTTGAACAAGAATGTGTTTAC<br>CTCTGCGGAGGAGCTGGAGCGCGCCAGCGGCTGGAGGAGCGCGAGC<br>GCATCATCAGGGAGATCGCGATGAATGGCCAGCCTGAGGTGCCCGGGA<br>CCAGGAGCCTGAATCGCTACTATTAGGACTACAAGGATGACGATGACAA<br>GGATTACAAAGACGACGATAAGGACTATAAGGATGATGACGACAAA |

---

|                                                                                                                                                                                                                                                                                                                     |
|---------------------------------------------------------------------------------------------------------------------------------------------------------------------------------------------------------------------------------------------------------------------------------------------------------------------|
| CAGCGACAGCGAGGATGGCAGTGAGGACACCGTGTCCGATCTCTCCGT<br>GCGGAGACACCGCCGCTTCGAGAGGACTTTGAACAAGAATGTGTTTCGC<br>CTCTGCGGAGGAGCTGGAGCGCGCCCAGCGGCTGGAGGAGCGCGAGC<br>GCATCATCAGGGAGATCTGGATGAATGGCCAGCCTGAGGTGCCCGGGA<br>CCAGGAGCCTGAATCGCTACTATTAGGACTACAAGGATGACGATGACAA<br>GGATTACAAAGACGACGATAAGGACTATAAGGATGATGACGACAAA |
|---------------------------------------------------------------------------------------------------------------------------------------------------------------------------------------------------------------------------------------------------------------------------------------------------------------------|

---
